# Supplementary material for: A Macrophage Response to Mycobacterium leprae Phenolic Glycolipid Initiates Nerve Damage in Leprosy
Source: PubMed Central journal article supplement (PMC5848073; doi:10.1016/j.cell.2017.07.030), 2017-08-24

**A** *M. leprae* phenolic glycolipid (PGL-1)

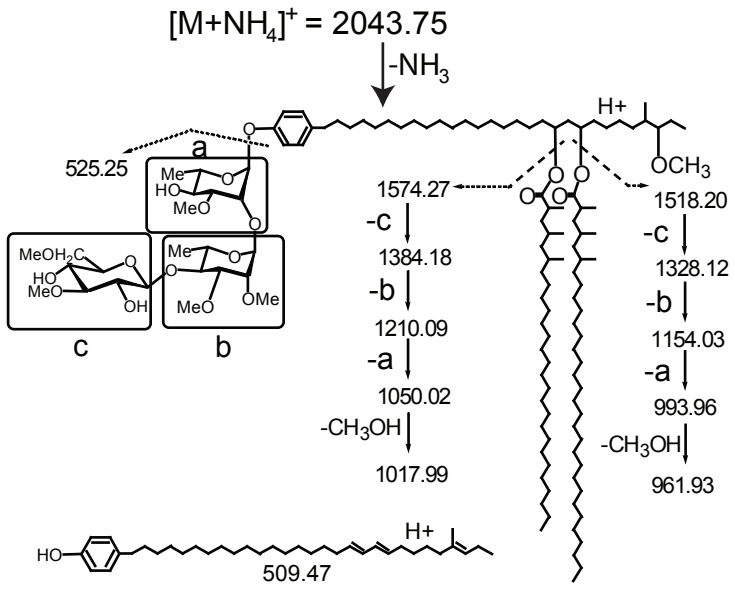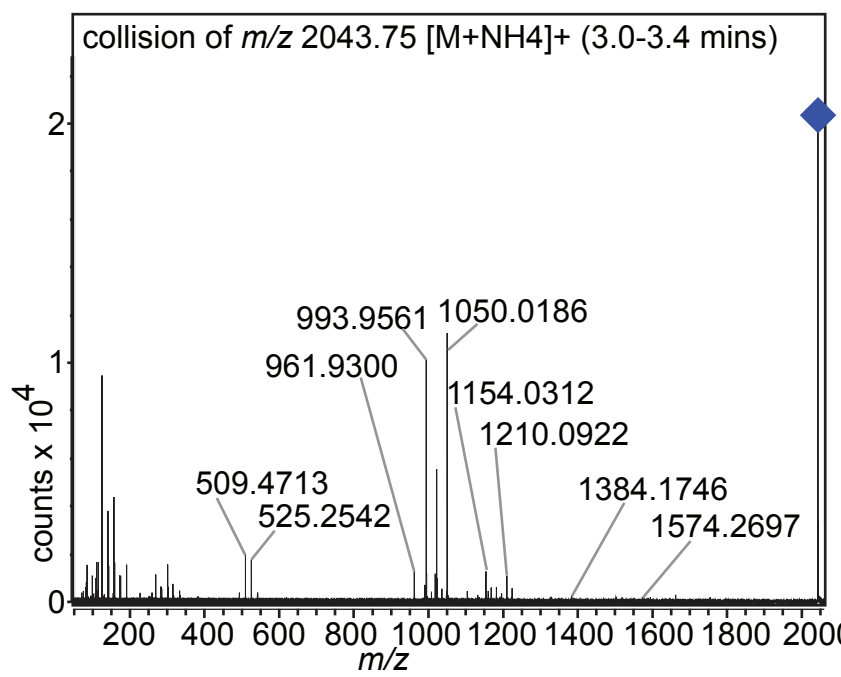

**B** Wildtype *M. marinum* phenolic glycolipid (PGL-mar)

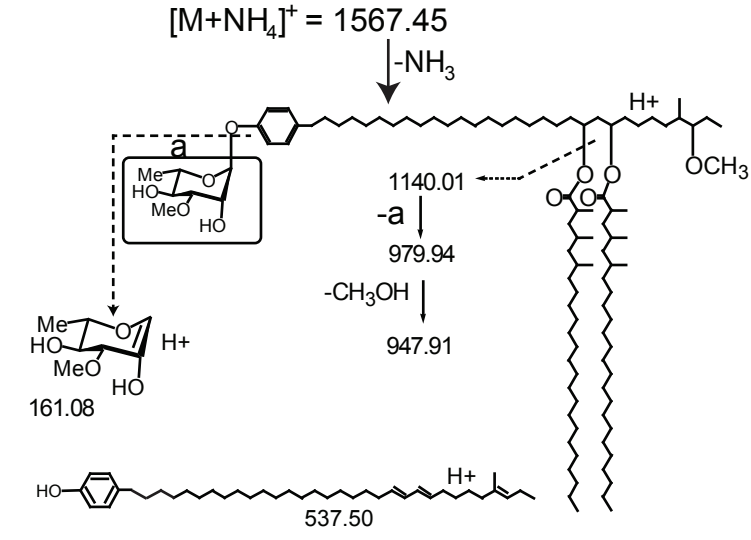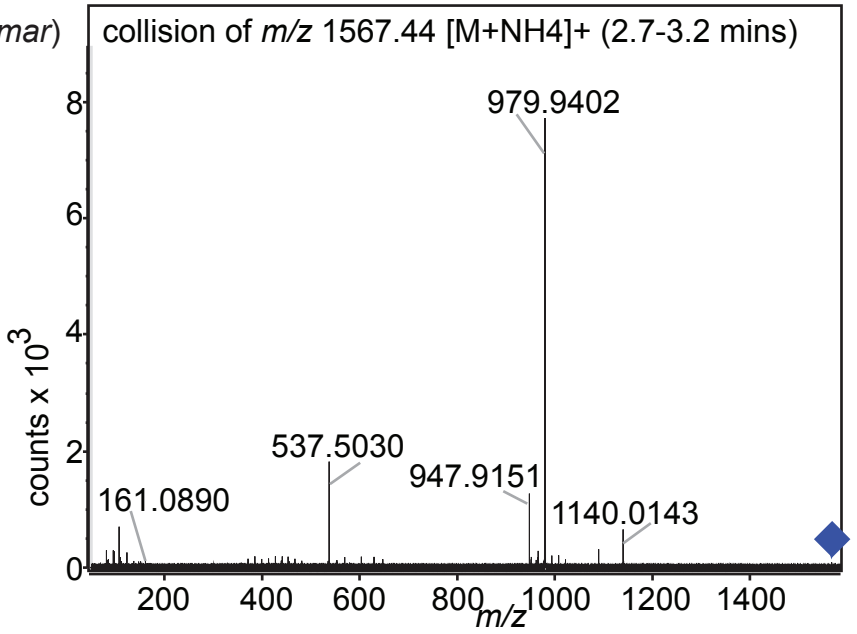

**C** *M. marinum*:PGL-1 phenolic glycolipid

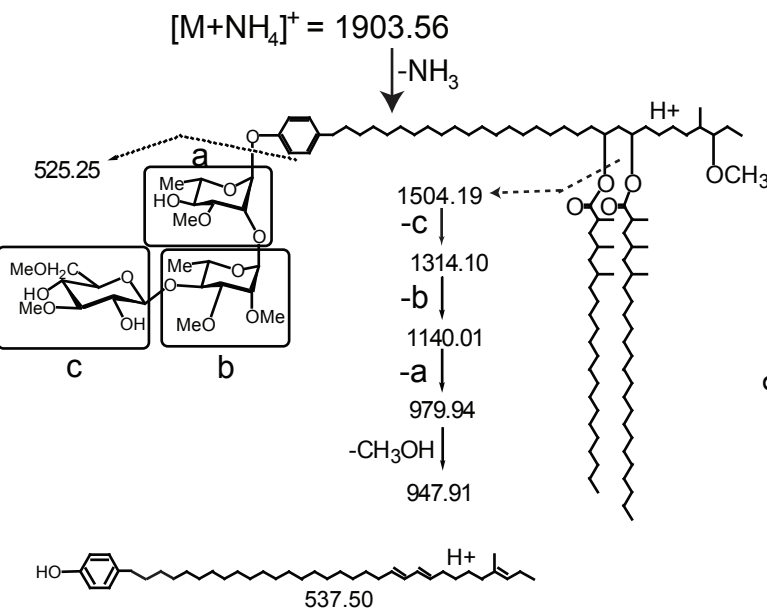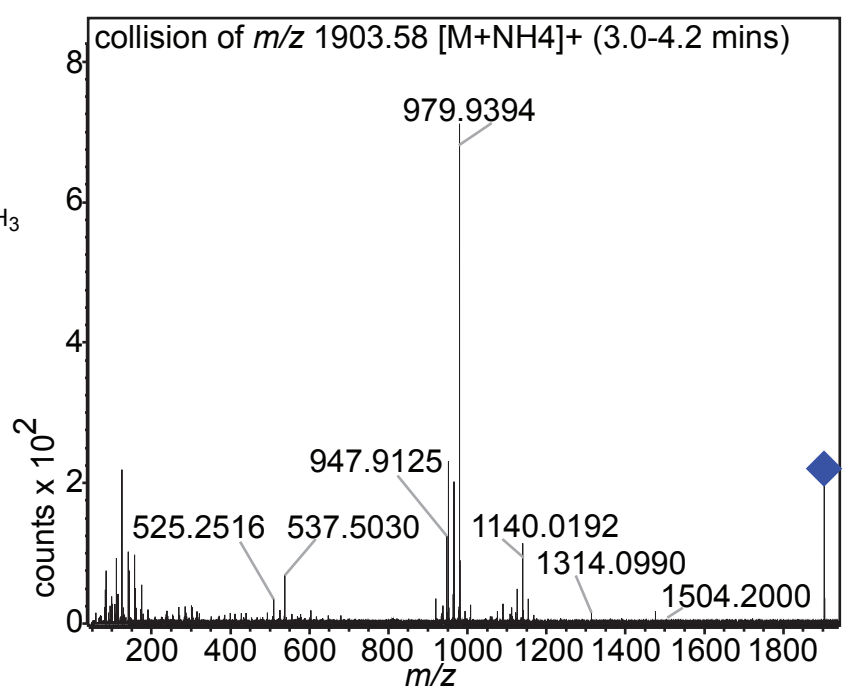

Supplement: NIHMS947035-supplement-Supplemental_Figure_2.pdf [file NIHMS947035-supplement-Supplemental_Figure_2.pdf]
