# Supplementary material for: A Macrophage Response to Mycobacterium leprae Phenolic Glycolipid Initiates Nerve Damage in Leprosy
Source: PubMed Central journal article supplement (PMC5848073; doi:10.1016/j.cell.2017.07.030), 2017-08-24

**A**

| fish # | # myelin protrusions | all lesions contain infected macs? |
|--------|----------------------|------------------------------------|
| 1      | 24                   | yes                                |
| 2      | 27                   | yes                                |
| 5      | 28                   | yes                                |
| 6      | 12                   | yes                                |
| 7      | 25                   | no                                 |
| 8      | 7                    | yes                                |
| 9      | 10                   | yes                                |
| 10     | 18                   | yes                                |
| 11     | 22                   | yes                                |
| 12     | 24                   | yes                                |
| 13     | 8                    | yes                                |

**Association of infected macrophages with demyelinating lesions.** At 2 days post-infection, demyelinating lesions were identified in *M. marinum*:PGL-1-infected *mbp:eGFP-CAAX;mpeg1:Brainbow* larvae (Figure 5I). Each lesion was scored for presence or absence of infected macrophages; association of infected macrophages with myelin protrusions was deemed significant ( $p = 0.01$ ) with a two-tailed binomial test. Lesions from fish #7 shown in B and C.

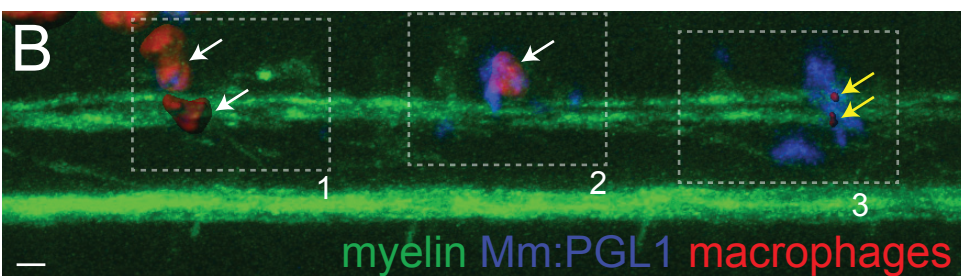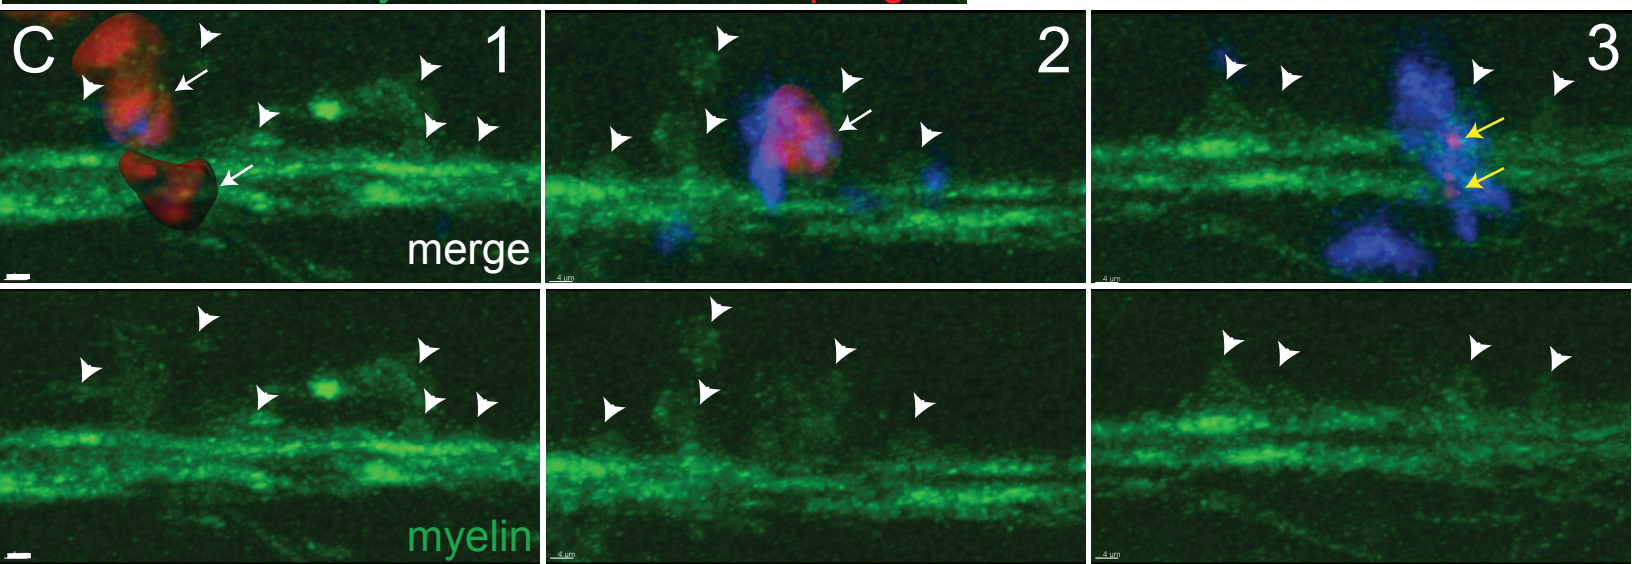

Supplement: NIHMS947035-supplement-Supplemental_Figure_4.pdf [file NIHMS947035-supplement-Supplemental_Figure_4.pdf]
