# Supplementary material for: A Macrophage Response to Mycobacterium leprae Phenolic Glycolipid Initiates Nerve Damage in Leprosy
Source: PubMed Central journal article supplement (PMC5848073; doi:10.1016/j.cell.2017.07.030), 2017-08-24

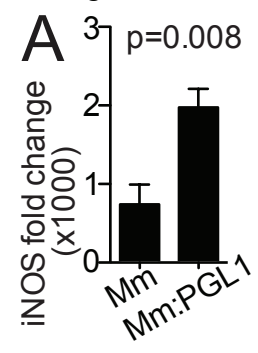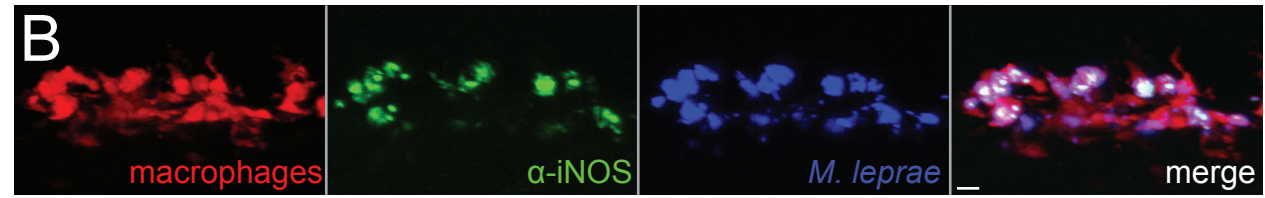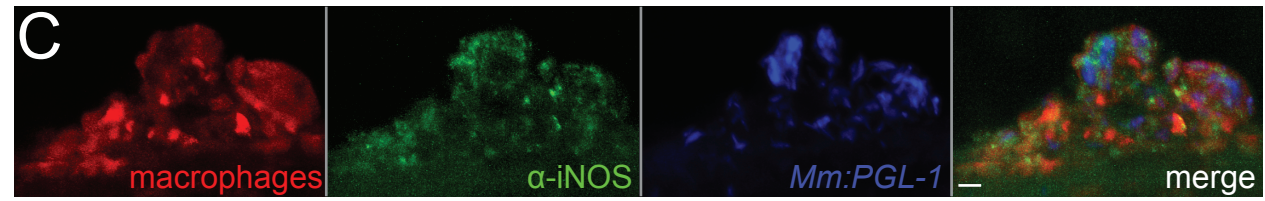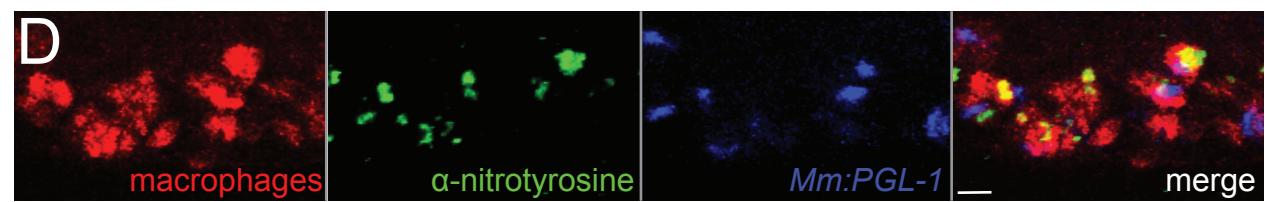

Supplement: NIHMS947035-supplement-Supplemental_Figure_5.pdf [file NIHMS947035-supplement-Supplemental_Figure_5.pdf]
