# Supplementary material for: A Macrophage Response to Mycobacterium leprae Phenolic Glycolipid Initiates Nerve Damage in Leprosy
Source: PubMed Central journal article supplement (PMC5848073; doi:10.1016/j.cell.2017.07.030), 2017-08-24
Supplement: NIHMS947035-supplement-Supplemental_Table_1.pdf [file NIHMS947035-supplement-Supplemental_Table_1.pdf]

**Table S1 Expression of *M. leprae*-determinants in Schwann cells and oligodendrocytes, with their respective functions.**  
Related to Figure 2.

| <u>marker</u>                     | <u>interaction with <i>M. leprae</i></u>               | <u>Schwann cell function</u>                         | <u>oligodendrocyte function</u> | <u>references</u>                                   |
|-----------------------------------|--------------------------------------------------------|------------------------------------------------------|---------------------------------|-----------------------------------------------------|
| myelin basic protein              | demyelination in patients                              | myelin constituent                                   | myelin constituent              | Scollard 2006                                       |
| ErbB2                             | Mlep signalling via ErbB2 promotes proliferation       | promotes differentiation, myelination, proliferation | promotes differentiation        | Tapinos 2006; Park 2001                             |
| Laminin 2, $\alpha$ -dystroglycan | Lep ML-LBP-21 and PGL1 bind, promoting internalization | attches SC to ECM                                    | attaches oligos to ECM          | Shimoji 1999; Ng 2000; Rambukkana 1998; Leiton 2015 |

Adapted from Scollard 2008, Table I (Scollard, 2008)
